# Supplementary material for: Nanocrystalline Cellulose as a Versatile Engineering Material for Extrusion-Based Bioprinting
Source: MDPI journal article supplement (doi:10.3390/pharmaceutics15102432), 2023-10-07
Supplement: s1 [file s1]

# Nanocrystalline Cellulose as a Versatile Engineering Material for Extrusion-Based Bioprinting Supplementary Material

Sophia A. Read, Chee Shuen Go, Miguel J.S. Ferreira, Cosimo Ligorio,  
Susan J. Kimber, Ahu G. Dumanli and Marco A. N. Domingos

## S.1 Printing Optimisation

| Alg1                                                                                |                                                                                     |                                                                                     |                                                                                      |       | Pressure (MPa) |
|-------------------------------------------------------------------------------------|-------------------------------------------------------------------------------------|-------------------------------------------------------------------------------------|--------------------------------------------------------------------------------------|-------|----------------|
| Feed rate (mm s <sup>-1</sup> )                                                     |                                                                                     |                                                                                     |                                                                                      |       |                |
| 10                                                                                  | 35                                                                                  | 50                                                                                  | 60                                                                                   |       |                |
|   |   |   |   | 0.018 |                |
|  |  |  |  | 0.022 |                |
|  |  |  |  | 0.028 |                |
|  |  |  |  | 0.043 |                |

Figure S1: Images taken using a USB camera microscope of completed prints using Alg1 dyed with red food colouring to aid visualisation. Pressures and feed rates were varied to determine their effect on the printing accuracy.

| Alg1CNC1                                                                            |                                                                                     |                                                                                     |                                                                                       | Pressure (MPa) |  |
|-------------------------------------------------------------------------------------|-------------------------------------------------------------------------------------|-------------------------------------------------------------------------------------|---------------------------------------------------------------------------------------|----------------|--|
| Feed rate (mm s <sup>-1</sup> )                                                     |                                                                                     |                                                                                     |                                                                                       |                |  |
| 10                                                                                  | 35                                                                                  | 50                                                                                  | 60                                                                                    |                |  |
|    |    |    |    | 0.018          |  |
|   |   |   |   | 0.022          |  |
|  |  |  |  | 0.028          |  |
|  |  |  |  | 0.050          |  |

Figure S2: Images taken using a USB camera microscope of completed prints using Alg1CNC1 dyed with red food colouring to aid visualisation. Pressures and feed rates were varied to determine their effect on the printing accuracy.
